# Supplementary material
Source: MDPI journal article supplement (https://www.mdpi.com/2076-0817/12/2/328)
Supplement: s1 [file s1]

Archive with 1 entries (1 files):
- pathogens-2097765-supplementary.pdf
